# Supplementary material
Source: PubMed Central journal article supplement (PMC2638941)
Supplement: btn580_1.pdf [file btn580_1.pdf]

Table S1. List of high-confidence data listed by sources.

| Source:    | Positives | Negatives | Kd<200 | Kd>200 | Comparat. | Total | Ref. |
|------------|-----------|-----------|--------|--------|-----------|-------|------|
| DBSFB01    | 28        | 292       | 5      | 1      | 105       | 431   | [1]  |
| DFSLBHKB05 | 88        | 133       | 0      | 0      | 200       | 421   | [2]  |
| SDBB99     | 69        | 103       | 25     | 0      | 294       | 491   | [3]  |
| DSB00      | 70        | 388       | 0      | 0      | 351       | 809   | [4]  |
| BMB03      | 9         | 27        | 7      | 12     | 0         | 55    | [5]  |
| BFS02      | 1024      | 0         | 0      | 0      | 0         | 1024  | [6]  |
| BJC02      | 0         | 0         | 25     | 99     | 0         | 124   | [7]  |
| BKSHRP03   | 0         | 0         | 33     | 0      | 0         | 33    | [8]  |
| CGU99      | 5         | 0         | 0      | 0      | 0         | 5     | [9]  |
| CK94a      | 67        | 0         | 0      | 0      | 0         | 67    | [10] |
| CK94b      | 0         | 9         | 10     | 0      | 0         | 19    | [11] |
| DB92       | 0         | 0         | 0      | 0      | 9         | 9     | [12] |
| DB93       | 0         | 1         | 5      | 3      | 0         | 9     | [13] |
| GP97       | 21        | 0         | 3      | 0      | 0         | 24    | [14] |
| ICK97      | 0         | 0         | 4      | 0      | 0         | 4     | [15] |
| IKC01      | 0         | 0         | 7      | 0      | 42        | 49    | [16] |
| JKW94      | 0         | 0         | 18     | 0      | 0         | 18    | [17] |
| KFM05      | 40        | 0         | 0      | 0      | 0         | 40    | [18] |
| LXC02      | 32        | 0         | 0      | 0      | 0         | 32    | [19] |
| NGC92      | 0         | 0         | 40     | 0      | 0         | 40    | [20] |
| PDB*       | 16        | 0         | 0      | 0      | 0         | 16    | [21] |
| RP94       | 0         | 0         | 12     | 0      | 0         | 12    | [22] |
| RUMIWCKC03 | 0         | 0         | 8      | 0      | 0         | 8     | [23] |
| TB90       | 11        | 0         | 0      | 0      | 0         | 11    | [24] |
| WGRP99     | 0         | 0         | 6      | 0      | 0         | 6     | [25] |
| WYB95      | 0         | 0         | 24     | 2      | 0         | 26    | [26] |
| Sum:       | 1480      | 953       | 232    | 117    | 1001      | 3783  |      |
| Filtered:  | 1086      | 835       | 226    | 117    | 914       | 3178  |      |

\* List of co-crystal structures obtained from PDB: 1A1F, 1A1G, 1A1H, 1A1I, 1A1J, 1A1K, 1A1L, 1AAY, 1G2D, 1G2F, 1JK1, 1JK2, 1MEY, 1P47, 1ZAA, 1F2I, 1LLM, 2DRP, 1UBD, and 2GLI.

1. Dreier, B., et al., *Development of zinc finger domains for recognition of the 5'-ANN-3' family of DNA sequences and their use in the construction of artificial transcription factors.* J Biol Chem, 2001. **276**(31): p. 29466-78.
2. Dreier, B., et al., *Development of zinc finger domains for recognition of the 5'-CNN-3' family DNA sequences and their use in the construction of artificial transcription factors.* J Biol Chem, 2005. **280**(42): p. 35588-97.

3. Segal, D.J., et al., *Toward controlling gene expression at will: selection and design of zinc finger domains recognizing each of the 5'-GNN-3' DNA target sequences*. Proc Natl Acad Sci U S A, 1999. **96**(6): p. 2758-63.
4. Dreier, B., D.J. Segal, and C.F. Barbas, 3rd, *Insights into the molecular recognition of the 5'-GNN-3' family of DNA sequences by zinc finger domains*. J Mol Biol, 2000. **303**(4): p. 489-502.
5. Blancafort, P., L. Magnenat, and C.F. Barbas, 3rd, *Scanning the human genome with combinatorial transcription factor libraries*. Nat Biotechnol, 2003. **21**(3): p. 269-74.
6. Benos, P.V., A.S. Lapedes, and G.D. Stormo, *Probabilistic code for DNA recognition by proteins of the EGR family*. J Mol Biol, 2002. **323**(4): p. 701-27.
7. Bulyk, M.L., P.L. Johnson, and G.M. Church, *Nucleotides of transcription factor binding sites exert interdependent effects on the binding affinities of transcription factors*. Nucleic Acids Res, 2002. **30**(5): p. 1255-61.
8. Bae, K.H., et al., *Human zinc fingers as building blocks in the construction of artificial transcription factors*. Nat Biotechnol, 2003. **21**(3): p. 275-80.
9. Cook, T., B. Gebelein, and R. Urrutia, *Sp1 and its likes: biochemical and functional predictions for a growing family of zinc finger transcription factors*. Ann N Y Acad Sci, 1999. **880**: p. 94-102.
10. Choo, Y. and A. Klug, *Toward a code for the interactions of zinc fingers with DNA: selection of randomized fingers displayed on phage*. Proc Natl Acad Sci U S A, 1994. **91**(23): p. 11163-7.
11. Choo, Y. and A. Klug, *Selection of DNA binding sites for zinc fingers using rationally randomized DNA reveals coded interactions*. Proc Natl Acad Sci U S A, 1994. **91**(23): p. 11168-72.
12. Desjarlais, J.R. and J.M. Berg, *Toward rules relating zinc finger protein sequences and DNA binding site preferences*. Proc Natl Acad Sci U S A, 1992. **89**(16): p. 7345-9.
13. Desjarlais, J.R. and J.M. Berg, *Use of a zinc-finger consensus sequence framework and specificity rules to design specific DNA binding proteins*. Proc Natl Acad Sci U S A, 1993. **90**(6): p. 2256-60.
14. Greisman, H.A. and C.O. Pabo, *A general strategy for selecting high-affinity zinc finger proteins for diverse DNA target sites*. Science, 1997. **275**(5300): p. 657-61.
15. Isalan, M., Y. Choo, and A. Klug, *Synergy between adjacent zinc fingers in sequence-specific DNA recognition*. Proc Natl Acad Sci U S A, 1997. **94**(11): p. 5617-21.
16. Isalan, M., A. Klug, and Y. Choo, *A rapid, generally applicable method to engineer zinc fingers illustrated by targeting the HIV-1 promoter*. Nat Biotechnol, 2001. **19**(7): p. 656-60.
17. Jamieson, A.C., S.H. Kim, and J.A. Wells, *In vitro selection of zinc fingers with altered DNA-binding specificity*. Biochemistry, 1994. **33**(19): p. 5689-95.
18. Kaplan, T., N. Friedman, and H. Margalit, *Ab initio prediction of transcription factor targets using structural knowledge*. PLoS Comput Biol, 2005. **1**(1): p. e1.
19. Liu, Q., et al., *Validated zinc finger protein designs for all 16 GNN DNA triplet targets*. J Biol Chem, 2002. **277**(6): p. 3850-6.
20. Nardelli, J., T. Gibson, and P. Charnay, *Zinc finger-DNA recognition: analysis of base specificity by site-directed mutagenesis*. Nucleic Acids Res, 1992. **20**(16): p. 4137-44.
21. Berman, H.M., et al., *The Protein Data Bank*. Nucleic Acids Res, 2000. **28**(1): p. 235-42.
22. Rebar, E.J. and C.O. Pabo, *Zinc finger phage: affinity selection of fingers with new DNA-binding specificities*. Science, 1994. **263**(5147): p. 671-3.
23. Reynolds, L., et al., *Repression of the HIV-1 5' LTR promoter and inhibition of HIV-1 replication by using engineered zinc-finger transcription factors*. Proc Natl Acad Sci U S A, 2003. **100**(4): p. 1615-20.

24. Thiesen, H.J. and C. Bach, *Target Detection Assay (TDA): a versatile procedure to determine DNA binding sites as demonstrated on SPI protein*. Nucleic Acids Res, 1990. **18**(11): p. 3203-9.
25. Wolfe, S.A., et al., *Analysis of zinc fingers optimized via phage display: evaluating the utility of a recognition code*. J Mol Biol, 1999. **285**(5): p. 1917-34.
26. Wu, H., W.P. Yang, and C.F. Barbas, 3rd, *Building zinc fingers by selection: toward a therapeutic application*. Proc Natl Acad Sci U S A, 1995. **92**(2): p. 344-8.
