# Supplementary material
Source: PubMed Central journal article supplement (PMC2638941)
Supplement: btn580_2.pdf [file btn580_2.pdf]

Table S2. Distribution of Cys<sub>2</sub>His<sub>2</sub> proteins in Transfac database

| # of zinc fingers | # of proteins | # of protein-DNA combinations |
|-------------------|---------------|-------------------------------|
| 1                 | 25            |                               |
| 2                 | 46            | 48                            |
| 3                 | 49            | 305                           |
| 4                 | 39            | 102                           |
| 5                 | 14            | 17                            |
| 6                 | 12            | 24                            |
| 7                 | 11            | 13                            |
| 8                 | 3             |                               |
| 9                 | 3             |                               |
| 10                | 2             |                               |
| 11                | 3             |                               |
| 13                | 4             |                               |
| 17                | 1             |                               |
| 18                | 1             |                               |
| 29                | 1             |                               |
