# Supplementary material
Source: PubMed Central journal article supplement (PMC2638941)
Supplement: btn580_3.pdf [file btn580_3.pdf]

Table S3. Detailed results of Mann-Whitney U-test.

| Protein: RSDH    |    |    |       |       |        |
|------------------|----|----|-------|-------|--------|
| Method           | N+ | N- | U+    | U-    | reject |
| SVM1             | 16 | 48 | 586.0 | 182.0 | +      |
| SVMp             | 16 | 48 | 571.0 | 197.0 | +      |
| KFM05            | 16 | 48 | 337.0 | 431.0 |        |
| BLS02            | 16 | 48 | 341.0 | 427.0 |        |
| MGM98            | 16 | 48 | 486.5 | 281.5 |        |
| SBGY95           | 16 | 48 | 636.5 | 131.5 | +      |
| DUM              | 16 | 48 | 495.0 | 273.0 | +      |
| critical values: |    |    | 490.1 | 277.9 |        |

| Protein: LRHN    |    |    |       |       |        |
|------------------|----|----|-------|-------|--------|
| Method           | N+ | N- | U+    | U-    | reject |
| SVM1             | 13 | 51 | 270.5 | 392.5 |        |
| SVMp             | 13 | 51 | 481.0 | 182.0 | +      |
| KFM05            | 13 | 51 | 235.0 | 428.0 |        |
| BLS02            | 13 | 51 | 364.0 | 299.0 |        |
| MGM98            | 13 | 51 | 604.0 | 59.0  | +      |
| SBGY95           | 13 | 51 | 522.0 | 141.0 | +      |
| DUM              | 13 | 51 | 355.0 | 308.0 |        |
| critical values: |    |    | 429.6 | 232.4 |        |

| Protein: RGPD    |    |    |       |       |        |
|------------------|----|----|-------|-------|--------|
| Method           | N+ | N- | U+    | U-    | reject |
| SVM1             | 17 | 47 | 551.0 | 248.0 | +      |
| SVMp             | 17 | 47 | 631.0 | 168.0 | +      |
| KFM05            | 17 | 47 | 478.0 | 321.0 |        |
| BLS02            | 17 | 47 | 580.5 | 218.5 | +      |
| MGM98            | 17 | 47 | 574.0 | 225.0 | +      |
| SBGY95           | 17 | 47 | 479.0 | 320.0 |        |
| DUM              | 17 | 47 | 370.0 | 429.0 |        |
| critical values: |    |    | 507.2 | 290.8 |        |

| Protein: REDV    |    |    |       |       |        |
|------------------|----|----|-------|-------|--------|
| Method           | N+ | N- | U+    | U-    | reject |
| SVM1             | 15 | 49 | 529.0 | 206.0 | +      |
| SVMp             | 15 | 49 | 535.0 | 200.0 | +      |
| KFM05            | 15 | 49 | 432.0 | 303.0 |        |
| BLS02            | 15 | 49 | 540.0 | 195.0 | +      |
| MGM98            | 15 | 49 | 361.5 | 373.5 |        |
| SBGY95           | 15 | 49 | 536.5 | 198.5 | +      |
| DUM              | 15 | 49 | 414.0 | 321.0 |        |
| critical values: |    |    | 470.8 | 263.2 |        |

| Protein: KASN    |    |    |       |       |        |
|------------------|----|----|-------|-------|--------|
| Method           | N+ | N- | U+    | U-    | reject |
| SVM1             | 48 | 16 | 384.0 | 384.0 |        |
| SVMp             | 48 | 16 | 328.0 | 440.0 |        |
| KFM05            | 48 | 16 | 398.0 | 370.0 |        |
| BLS02            | 48 | 16 | 354.0 | 414.0 |        |
| MGM98            | 48 | 16 | 280.5 | 487.5 |        |
| SBGY95           | 48 | 16 | 410.5 | 357.5 |        |
| DUM              | 48 | 16 | 381.0 | 387.0 |        |
| critical values: |    |    | 490.1 | 277.9 |        |
