# Supplementary material
Source: PubMed Central journal article supplement (PMC2638941)
Supplement: btn580_4.pdf [file btn580_4.pdf]

**Table S4.** List of most important coordinates for weight vector learned by linear SVM using all high-confidence experimental data. Zif268 ‘classical’ contacts are highlighted.

| position | amino acid | base | weight |
|----------|------------|------|--------|
| 2        | H          | g    | 4.611  |
| 3        | R          | g    | 4.443  |
| 3        | I          | t    | 3.434  |
| 4        | S          | g    | 3.425  |
| 4        | V          | c    | 3.011  |
| 3        | L          | t    | 2.595  |
| 3        | S          | t    | 2.469  |
| 2        | H          | a    | 2.387  |
| 2        | K          | g    | 2.215  |
| 3        | H          | t    | 2.212  |
| 3        | S          | c    | 2.202  |
| 3        | G          | c    | 2.075  |
| 1        | S          | c    | 2.049  |
| 2        | A          | t    | 2.014  |
| 2        | S          | t    | 1.995  |
| 2        | D          | c    | 1.904  |
| 3        | W          | t    | 1.779  |
| 2        | N          | a    | 1.731  |
| 1        | R          | g    | 1.588  |
| 2        | Q          | c    | 1.525  |
| 3        | Q          | a    | 1.51   |
| 3        | N          | t    | 1.142  |
| 3        | T          | t    | 1.14   |
| 4        | Q          | a    | 1.12   |
| 4        | S          | a    | 1.099  |
| 2        | Q          | a    | 1.086  |
| 4        | T          | a    | 1.075  |
| 4        | C          | g    | 1.071  |
| 4        | M          | c    | 1.035  |
| 1        | L          | g    | 0.896  |
| 4        | H          | c    | 0.758  |
| 1        | Q          | c    | 0.653  |
| 2        | L          | c    | 0.653  |
| 1        | T          | t    | 0.644  |
| 1        | N          | c    | 0.567  |
| 1        | V          | a    | 0.554  |
| 3        | Y          | g    | 0.537  |
| 4        | Q          | c    | 0.528  |
| 4        | R          | g    | 0.489  |
| 1        | H          | t    | 0.485  |
